# Supplementary material
Source: PubMed Central journal article supplement (PMC2871488)

# Supplementary Figure 1

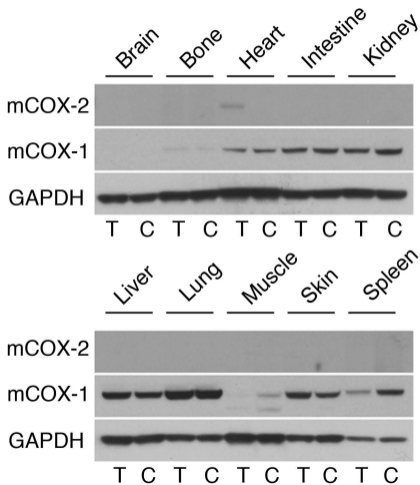

## Supplementary Figure 2

**A**

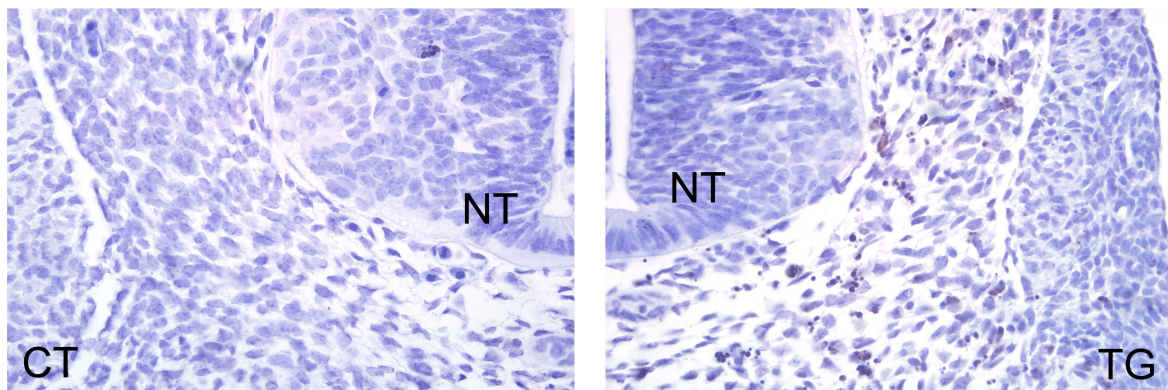

**B**

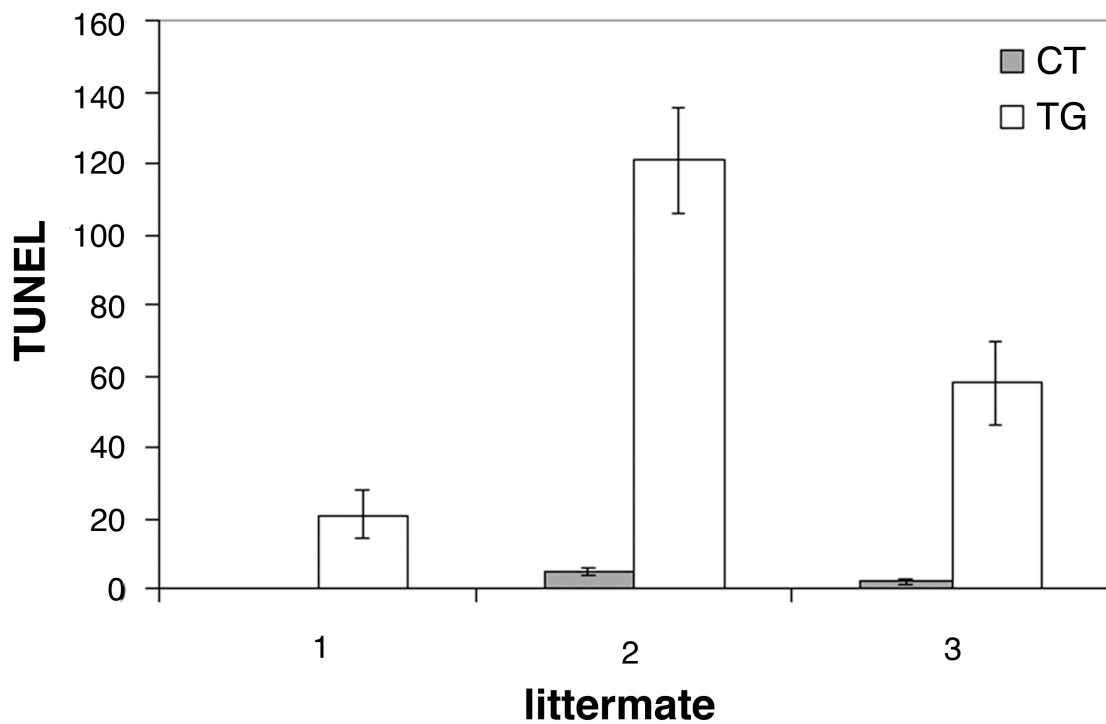

# Supplementary Figure 3

CT

TG

A

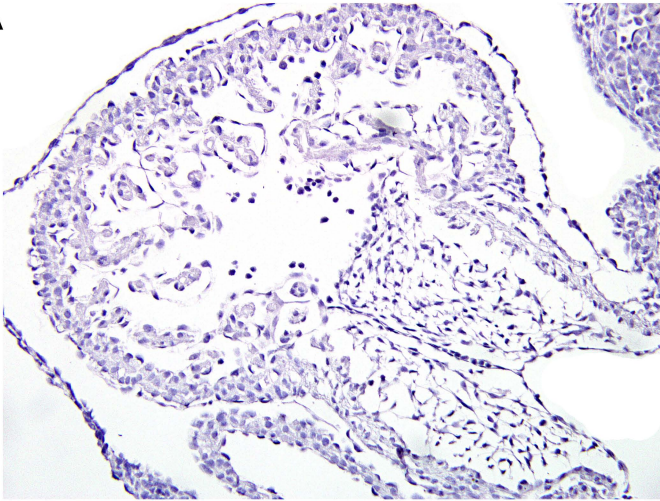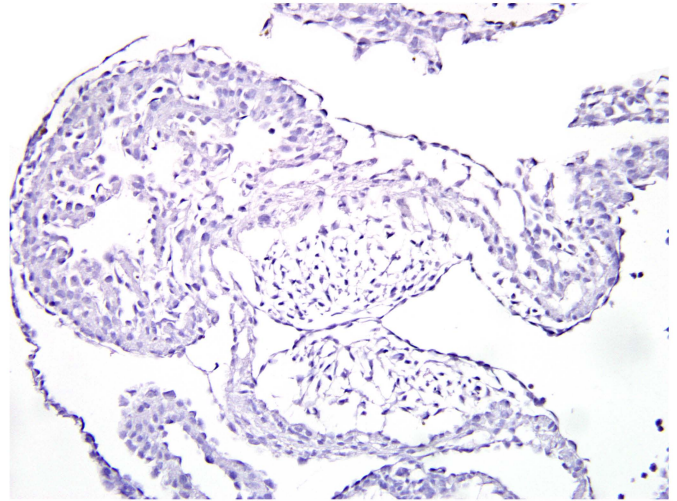

B

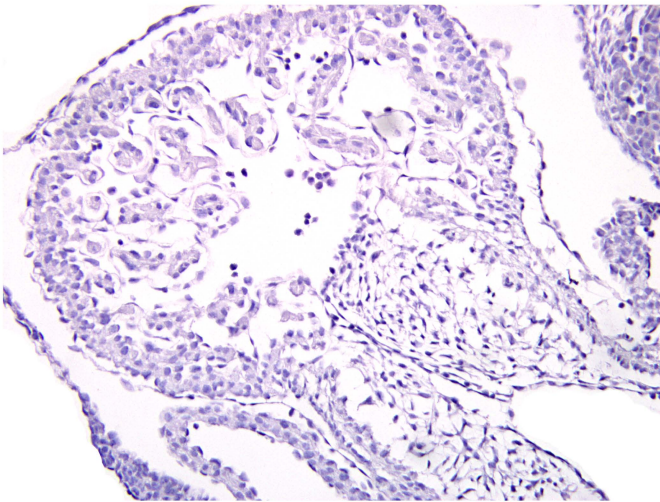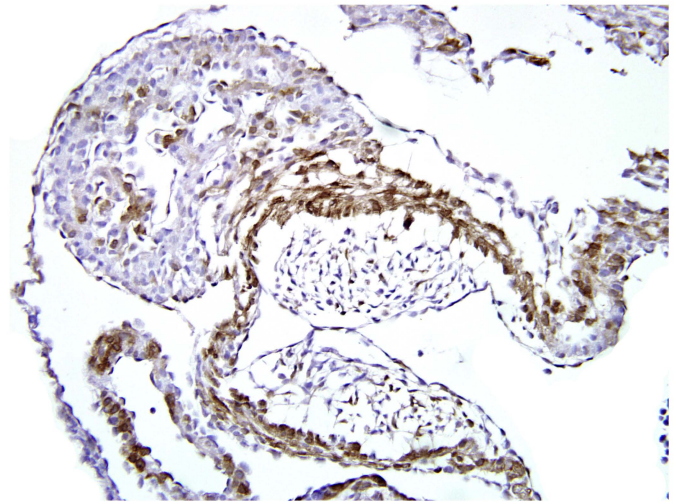

Supplementary Figure 4

CT

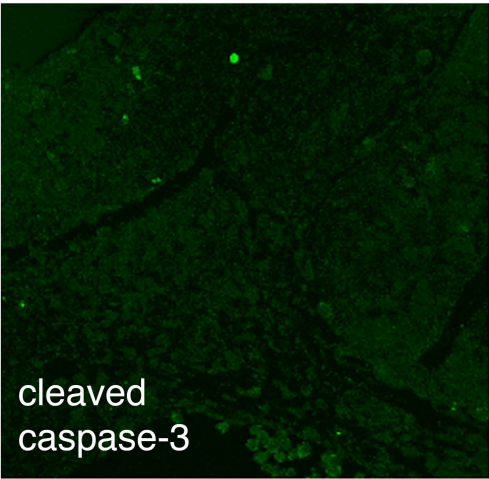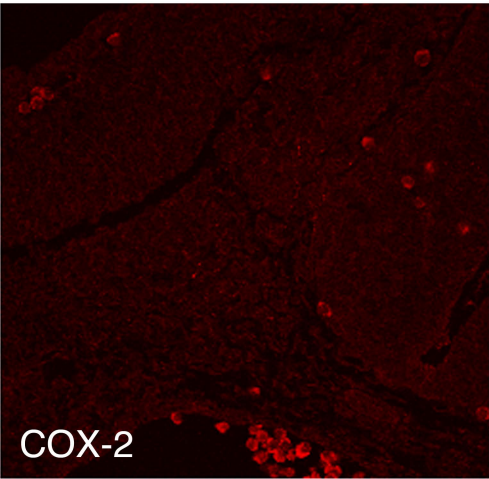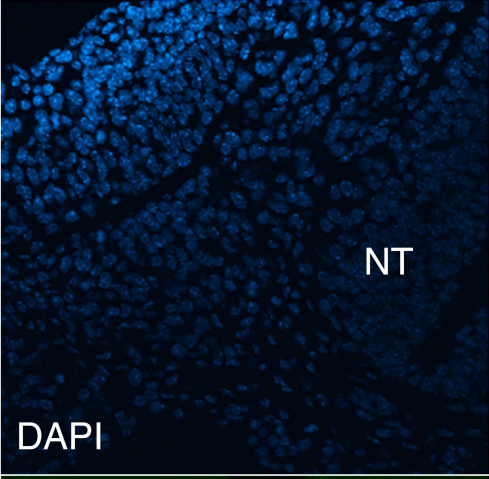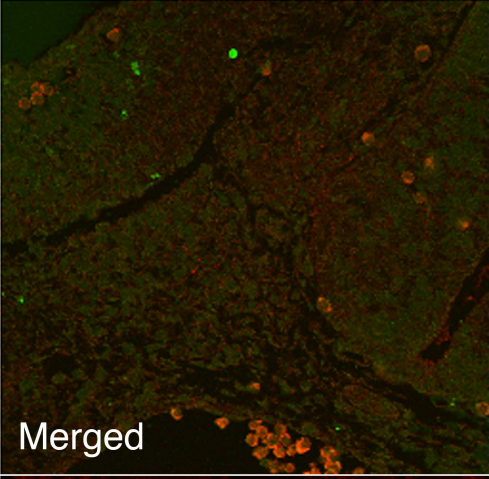

TG

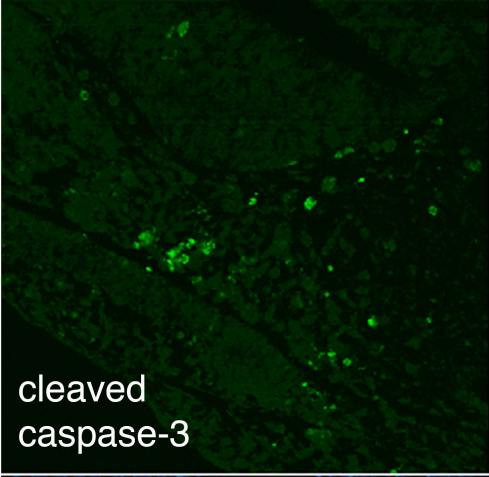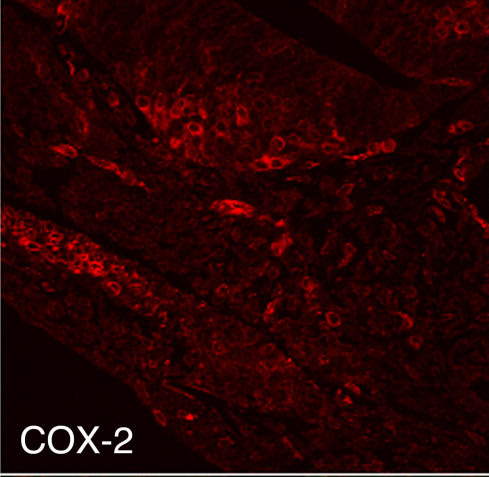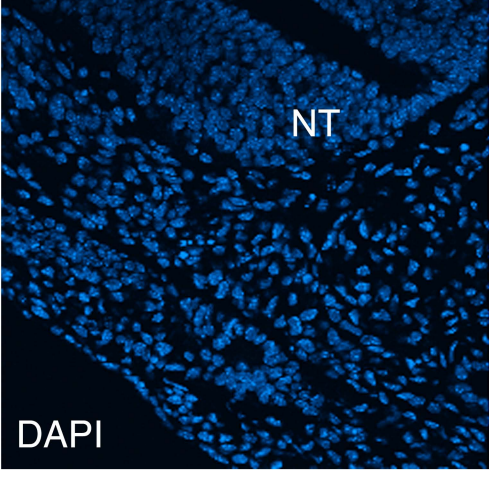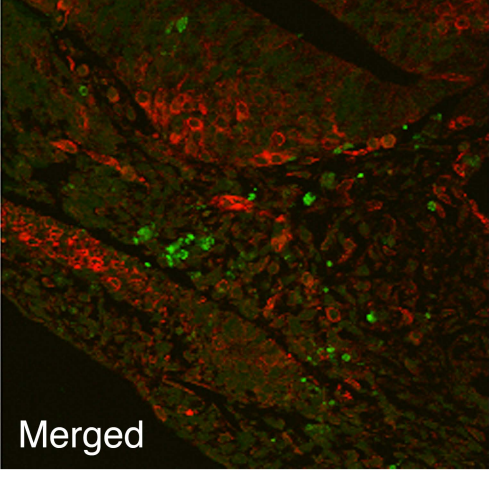

Supplement: supp_M109.078576_jbc.M109.078576-1.pdf [file supp_M109.078576_jbc.M109.078576-1.pdf]
